# Supplementary material for: A poly(2-ethylaniline) blend membrane for vanadium redox flow batteries
Source: Royal Society of Chemistry journal article supplement (doi:10.1039/d3lp00152k), 2023-11-29
Supplement: d3lp00152k1.pdf [file d3lp00152k1.pdf]

# Supporting Information

## Poly(2-ethyl-aniline) blend membrane for vanadium redox flow battery

Priyanka P. Bavdane<sup>a,b</sup>, Sooraj Sreenath<sup>a,b</sup>, Devendra Y. Nikumbe<sup>a,b</sup>, Bhavana Bhatt<sup>a</sup>, Chetan M. Pawar<sup>a,b</sup>, Vidhiben Dave<sup>a,b</sup>, and Rajaram K. Nagarale<sup>a,b\*</sup>

<sup>a</sup> Electro Membrane Processes Laboratory, Membrane Science and Separation Technology Division, CSIR-Central Salt and Marine Chemicals Research Institute, Bhavnagar 364002, India

<sup>b</sup> Academy of Scientific and Innovative Research (AcSIR), Ghaziabad- 201002, India

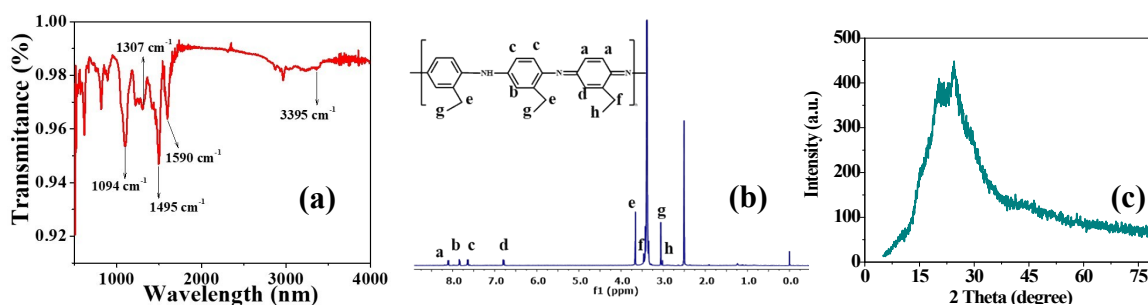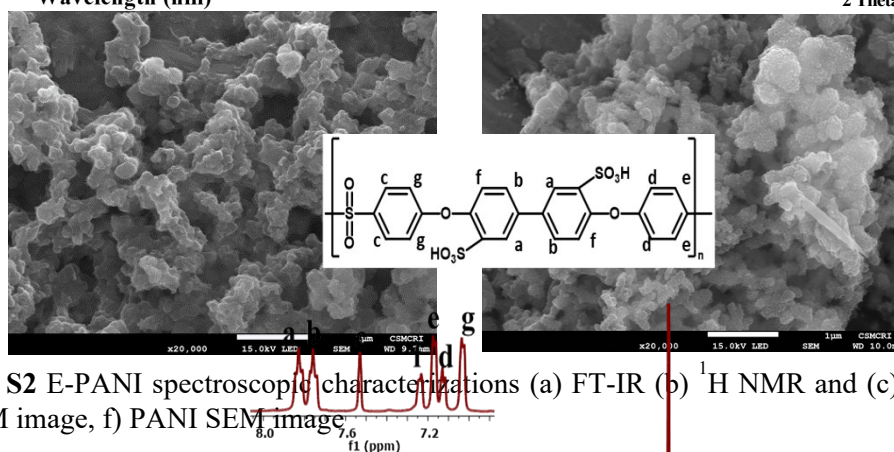

Fig. S2 E-PANI spectroscopic characterizations (a) FT-IR (b) <sup>1</sup>H NMR and (c) p-XRD, (e) SEM image, (f) PANI SEM image

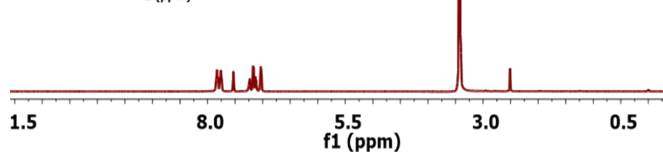

Fig. S3 <sup>1</sup>H-NMR spectra of sulfonated polyether sulfone

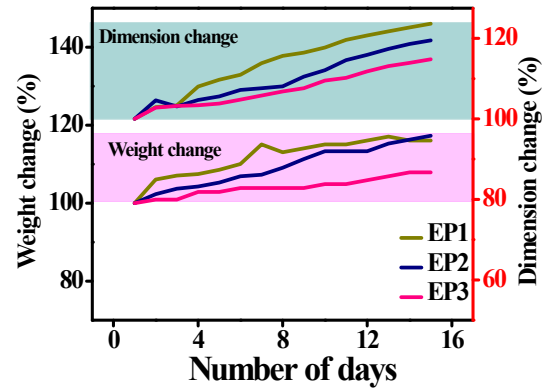

**Fig. S4.** Dimension and weight change evaluation of E-PANI composite membranes with respect to time

**Table S1:** The comparison of VRFB performance of PANI composite membranes with that of Prepared E-PANI-SPES

| Membrane code              | VRFB study       | CD<br>mA/cm <sup>2</sup> | CE<br>% | VE<br>% | EE<br>% | Charge-discharge<br>cycling<br>stability | Ref.<br>no                             |
|----------------------------|------------------|--------------------------|---------|---------|---------|------------------------------------------|----------------------------------------|
| SPEEK/PANi-GO-2            | Rate performance | 20                       | 96.5    | 88.0    | 84.0    | 300 cycle<br>at 30mA<br>cm <sup>-2</sup> | [1]                                    |
|                            |                  | 30                       | 97.5    | 84.0    | 82.0    |                                          |                                        |
|                            |                  | 40                       | 98.0    | 78.0    | 77.0    |                                          |                                        |
|                            |                  | 50                       | 98.5    | 75.0    | 74.0    |                                          |                                        |
|                            |                  | 60                       | 99.1    | 70.0    | 69.0    |                                          |                                        |
|                            | Cycling test     | 30 <sup>a</sup>          | 98.5    | 83.0    | 81.7    |                                          |                                        |
| SPEEK-E600/PANI =<br>80/20 | Rate performance | 20                       | 97.0    | 94.0    | 91.0    | 30 cycles at<br>40 mA cm <sup>-2</sup>   | [2<br>]                                |
|                            |                  | 30                       | 98.0    | 93.0    | 92.0    |                                          |                                        |
|                            |                  | 40                       | 98.5    | 92.5    | 91.0    |                                          |                                        |
|                            |                  | 50                       | 99.0    | 92.0    | 90.0    |                                          |                                        |
|                            | Cycling test     | 40 <sup>b</sup>          | 98.4    | 92.8    | 91.3    |                                          |                                        |
|                            | EP3              | Rate performance         | 20      | 90.5    | 85.0    | 77.0                                     | 300 cycle at<br>140mA cm <sup>-2</sup> |
| 40                         |                  |                          | 92.0    | 83.0    | 76.0    |                                          |                                        |
| 60                         |                  |                          | 94.3    | 80.0    | 75.0    |                                          |                                        |
| 80                         |                  |                          | 95.5    | 73.0    | 70.0    |                                          |                                        |
| 100                        |                  |                          | 98.0    | 63.0    | 62.0    |                                          |                                        |
| Cycling test               |                  | 140                      | 99.5    | 53.0    | 52.7    |                                          |                                        |

composite membranes

Foot note: Cycle no. a=100, b=30, \* present work, SPEEK/PANi-GO-2: SPEEK/polyaniline-functionalized graphene oxide

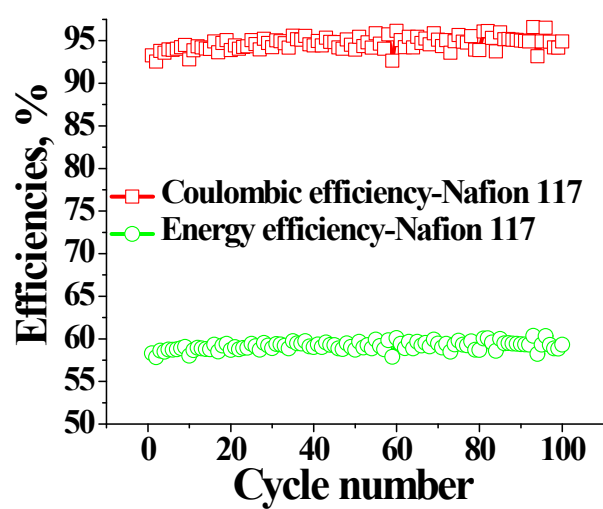

Fig. S5. Cycling battery performance of Nafion®117 at 100 mA cm<sup>-2</sup>

Table S2. Comparative literature values of battery performance ion exchange membrane with synthesized membrane in VRFB

| Membrane                       | Current density (cm <sup>-2</sup> ) | CE (%) | VE (%) | EE (%) | References |
|--------------------------------|-------------------------------------|--------|--------|--------|------------|
| SPEEK/HMN-6 composite membrane | 120                                 | ~98    | ~80    | 82.1   | 3          |

|                                                                           |        |       |       |       |           |
|---------------------------------------------------------------------------|--------|-------|-------|-------|-----------|
| S/O-bPn-1.5% composite membrane                                           | 100    | 98.3  | ~88   | 86.6  | 4         |
| PAES-8mPip-x                                                              | 60     | 94.78 | 90.15 | 85.44 | 5         |
| bSPI/s-MWCNTs-2% composite membrane                                       | 80-160 | ~96   | 80%   | 77    | 6         |
| sPSScl9                                                                   | 180    | ~92   | ~80   | 88    | 7         |
| Sulfonated polyethylene–styrene–divinylbenzene                            | 140    | 95    | 63    | 67    | 8         |
| Poly (phenylene ether) QCPPAE                                             | 50     | 99.00 | 88    | 89    | 9         |
| SPI/0.5% PDAP                                                             | 100    | 96    | 87.02 | 84.04 | 10        |
| s-FSPI                                                                    | 60     | 99    | 77.30 | 77    | 11        |
| C6QPSF                                                                    | 60     | 98    | 93    | 91.10 | 12        |
| SPEEK/ ETS10/ PTFE                                                        | 100    | 98    | 78.80 | 77.90 | 13        |
| MD2.0-10                                                                  | 80     | 99.30 | 83    | 82    | 14        |
| p-TPN1                                                                    | 100    | 100   | 84.50 | 84.70 | 15        |
| Sulfonated poly(terphenylene) (SPTP) blended with Polybenzimidazole (PBI) | 100    | 99.50 |       | 86.20 | 16        |
| TA15-SPBP membrane                                                        | 80     | 99.1  |       | 87    | 17        |
| PC50NB30                                                                  | 200    | 94    | 82    | 78    | 18        |
| Q/S-AIEMs                                                                 | 20     | 98    | ~90   | 90    | 19        |
| EP3                                                                       | 140    | 99.5  | 53.0  | 52.7  | This work |

Footprint: SPEEK- sulfonated poly(ether ether ketone), HMN- Phosphotungstic acid (HPW)-metal organic framework (MIL-101-NH2) nanohybrids, S/O- - sulfonated poly(ether ether ketone) bPn- phosphorus nanosheet, PAES-8mPip-x- Piperidine ions based on poly(aryl ether sulfone)s; bSPI/s-MWCNTs-2% - sulfonated polyimide (bSPI)/Sulfonated multiwalled carbon nanotubes; sPSScl9- sulfonated poly(phenylene sulfide sulfone) with 9% crosslinking, QCPPAE - Quaternised chloromethylated poly(p-phenylene) and poly(arylene ether), SPI/0.5% PDAP - sulfonated polyimide (SPI) blend with poly [bis (4,4'- diaminobenzidine-2,2'-disulfonic acid) phosphazene] (PDAP), s-FSPI - fluorinated sulfonated polyimide, C6QPSF - Amphiphilic quaternary ammonium polysulfone (PSF) with hydrophobic hexane side chains, PANI-GO- Polyaniline-Graphene oxide, ETS10/ PTFE- Engelhard titanosilicate-10/ poly(tetrafluoroethylene), MD2.0-10- Cross-linked aromatic polyamide (PA) thin film membrane, p-TPN1- Poly(terphenylene), Sulfonated poly(terphenylene)/ Polybenzimidazole, TA15-SPBP membrane-sulfonated polybiphenyl tethered with pendant tertiary amine groups, PC50NB30- Perfluorinated sulfonic acid.

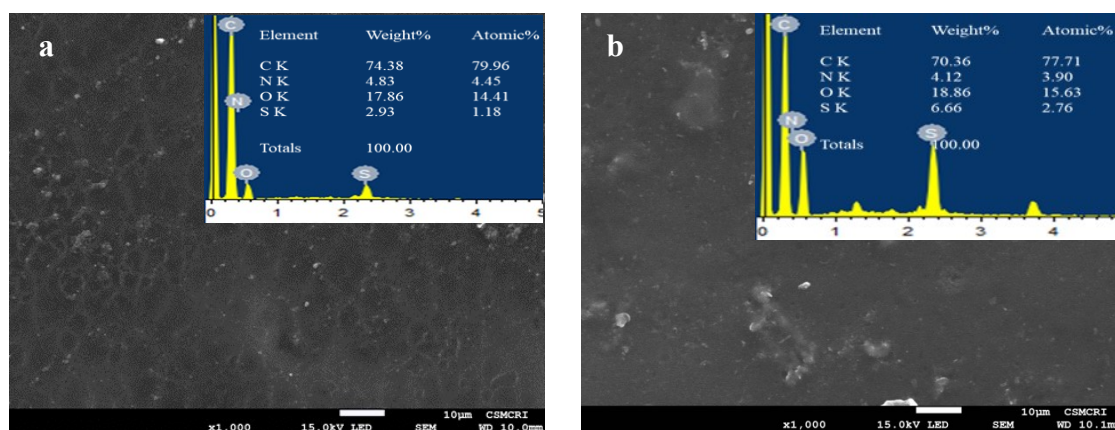

**Fig. S5** Represent the surface morphology of EP3 membrane a) before and b) after battery performance showing no leaching of E-PANI.

**Table S3** Comparison of electrochemical properties for E-PANI composite membranes and SPES before and after Battery performance

| Membrane code | Water content (%) |       | IEC (meq g <sup>-1</sup> ) |       | Young modulus (MPa) |       |
|---------------|-------------------|-------|----------------------------|-------|---------------------|-------|
|               | Before            | After | Before                     | After | Before              | After |
| SPES          | 30.4              | 35.1  | 1.42                       | 0.97  | 189                 | 186.2 |
| EP1           | 17.1              | 21.6  | 1.32                       | 0.91  | 251                 | 245   |
| EP2           | 16.6              | 29.4  | 1.25                       | 0.91  | 256                 | 248   |
| EP3           | 19.8              | 34.7  | 1.22                       | 0.86  | 273                 | 266   |

## Reference

- [1] Y. Zhang, H. Wang, W. Yu, H. Shi, Structure and Properties of Sulfonated Poly(ether ether ketone) Hybrid Membrane with Polyaniline-Chains-Modified Graphene Oxide and Its Application for Vanadium Redox Flow Battery, *ChemistrySelect* 3 (2018) 9249-9258. <https://doi.org/10.1002/slct.201801548>
- [2] O. David, K. Percin, T. Luo, Y. Gendel, M. Wessling, Proton-exchange membranes based on sulfonated poly(ether ether ketone)/polyaniline blends for all- and air-vanadium redox flow battery applications, *J Energy Storage*, 1 (2015) 65-71. <http://dx.doi.org/10.1016/j.est.2015.01.001>
- [3] Zhai, S.; Lu, Z.; Ai, Y.; Liu, X.; Wang, Q.; Lin, J.; He, S.; Tian, M.; Chen L. Highly selective proton exchange membranes for vanadium redox flow batteries enabled by the incorporation of water-insoluble phosphotungstic acid-metal organic framework nanohybrids. *Journal of Membrane Science* 2022, 645, 120214.
- [4] Afzal.; Chen, W.; Pang, B.; Yan, X.; Jiang, X.; Cui, F.; Wu, X.; He, G. Oxidized black phosphorus nanosheets/sulfonated poly (ether ether ketone) composite membrane for vanadium redox flow battery. *Journal of Membrane Science* 2022, 644, 120084.
- [5] Tao, Z.; Wang, C.; Cai, S.; Qian, J.; Li J. Efficiency and Oxidation Performance of Densely Flexible Side-Chain Piperidinium-Functionalized Anion Exchange Membranes for Vanadium Redox Flow Batteries. *ACS Appl. Energy Mater.* 2021, 4, 14488–14496.
- [6] Liu, J.; Duan, H.; Xu, W.; Long, J.; Huang, W.; Luo H.; Li, J.; Zhang, Y.; Branched sulfonated polyimide/s-MWCNTs composite membranes for vanadium redox flow battery application. *International journal of hydrogen energy* 2021.

- [7] Gigli, M.; Mecheri, B.; Licoccia, S.; D'Epifanio, A. Crosslinked sulfonated poly(phenylene sulfide sulfone) membranes for vanadium redox flow batteries. *Sustainable Materials and Technologies* 2021, 28, e00249.
- [8] Sreenath, S.; Pawar, C. M.; Bavdane, P.; Nikumbe D. Y.; Nagarale, R. K. A sulfonated polyethylene–styrene cation exchange membrane: a potential separator material in vanadium redox flow battery applications. *Energy Adv.* 2022.
- [9] Chaa, M. S.; Lee, J. Y.; Kim, T.; Jeong, H. Y.; Shina, H. Y.; Oh, S. G.; Hong, Y. T. Preparation and characterization of crosslinked anion exchange membrane (AEM) materials with poly(phenylene ether)-based short hydrophilic block for use in electrochemical applications. *Journal of Membrane Science* 2017, 16, 32307-9.
- [10] Zhang, M.; Wang, G.; Li, F.; He, Z.; Zhang J.; Chen, J.; Wang, R. High conductivity membrane containing polyphosphazene derivatives for vanadium redox flow battery. *Journal of Membrane Science* 2021, 630, 119322.
- [11] Li, J.; Yuan, X.; Liu, S.; He, Z.; Zhou, Z.; Li, A. A Low-Cost and High-Performance Sulfonated Polyimide Proton Conductive Membrane for Vanadium Redox Flow/Static Batteries. *ACS Appl. Mater. Interfaces* 2017, 9, 38, 32643–32651.
- [12] Si, J.; Lv, Y.; Lu, S.; Xiang, Y. Microscopic phase-segregated quaternary ammonia polysulfone membrane for vanadium redox flow batteries. *Journal of Power Sources* 2019, 428, 88–92.
- [13] Kim, J.; Lee, Y.; Jeon, J. D.; Kwak, S. Y. Ion-exchange composite membranes pore-filled with sulfonated poly(ether ether ketone) and Engelhard titanasilicate-10 for improved performance of vanadium redox flow batteries. *Journal of Power Sources* 2018, 383, 1–9.
- [14] Teng, X.; Guo, Y.; Liu, D.; Li, G.; Yu, C.; Dai, J. A polydopamine-coated polyamide thin film composite membrane with enhanced selectivity and stability for vanadium redox flow battery. *Journal of Membrane Science* 2020, 601, 117906.

- [15] Jong, W.; Jeon, Y.; Han, J.; Kim, J. H.; Bae, C.; Kim, S. Poly(terphenylene) Anion Exchange Membranes with High Conductivity and Low Vanadium Permeability for Vanadium Redox Flow Batteries (VRFBs). *Journal of Membrane Science* 2020, 598, 117665.
- [16] Xu, J. Zha, H.; Li, W.; Li, P.; Chen, C.; Yue, Z.; Zou, L.; Yang, H. Facile strategy for preparing a novel reinforced blend membrane with high cycling stability for vanadium redox flow batteries. *Chemical Engineering Journal*, 2022, 433 133197.
- [17] Xu, J.; Dong, S.; Li, P.; Li, W.; Tian, F.; Wang, W.; Cheng, C.; Yue Z.; Yang, H. Novel ether-free sulfonated poly(biphenyl) tethered with tertiary amine groups as highly stable amphoteric ionic exchange membranes for vanadium redox flow battery. *Chemical Engineering Journal* 2021, 424, 130314.
- [18] Chen, Y.; Zhang, S.; Jin, J.; Liu, C.; Liu, Q.; Jian, X. Poly(phthalazinone ether ketone) Amphoteric Ion Exchange Membranes with Low Water Transport and Vanadium Permeability for Vanadium Redox Flow Battery Application. *ACS Appl. Energy Mater.* 2019, 2, 8207–8218.
- [19] Kim, J. Q.; So, S.; Kim, H.; Choi, S. Q.; Highly Ordered Ultrathin Perfluorinated Sulfonic Acid Ionomer Membranes for Vanadium Redox Flow Battery. *ACS Energy Lett.* 2021, 6, 184–192.
